# Supplementary material for: A novel baculovirus-derived promoter with high activity in the baculovirus expression system
Source: PeerJ. 2016 Jun 28;4:e2183. doi: 10.7717/peerj.2183 (PMC4928464; doi:10.7717/peerj.2183)
Supplement: Figure S2 [file peerj-04-2183-s002.xlsx]

## Sheet: Hoja1
cell type	hours	polh												pSeL												pSeL-140												pSeL-120
Se301	24	2.11	1.09											1.35	1.61											3.43	1.27											1.99	2.32
	36	1.57	1.59											4.2	4.58											5.87	4.99											3.45	6.06
	48	5.92	5.49											20.51	14.31											35.56	24.92											5.22	11.6
	72	49.16	34.67											90.93	58.06											119.42	81.64											124.94	130.89
	96	112.21	87.79											71.8	90.11												234.42											197.55	217.8
Sf21	24	0.27	0.18	0.22	0.29	0.32	0.45							1.35	1.47	0.8	0.87	0.68	0.53							2.59	1.61	0.68	0.76	2.67	2.84							0.62		0.44	0.43	0.42	0.63
	36	1.41	2.29	2.57	2.77	3.14	1.31							11.83	12.48	7.27	7.12	8.91	4.26							15.31	14.17	7.24	5.38	20.49	24.46							6.91	5.41	4.26	4.8	5.01	1.84
	48	13.42	11.27	10.67	15.14	21.83	7.89							26.71	33.77	23.6	25.61	21.33	13.35							47.61	32.44	22.3	23.62	62.69	58.88							38.76		19.44	20.86	13.7	34.3
	72	66.07	95.34	72.06	49.27	92.92	45.37							79.98	65.57	55.43	53.07	69.1	70.04							55.11	60.43	62.16	62.46	84.63	96.08							145.35		94.93	95.8	101.09	114.75
	96	95.81	91.15	88.06	86.54	120.19	118.25							72.16	59.89	54.02	46.35	65.47	69.62							105.77	135.25	28.68	71.05	75.91	63.15							273.09		168.64		125.62	166.66
Hi5	24	2.57	3.02	2.74	2.74	1.83	2.06	2.06	2.02	2.05	2.19	2.16	2.23	3.39	3.5	3.71	3.9	2.11	2.38	2.44	2.22	2.86	2.7	3.06	2.65	5.58	5.93	5.87		4.62	5.11	4.85	4.32	3.57	3.82	4.06	4.13	7.51	7.21	7.51	7.7	4.91	5.46	5.92	5.23	4.89	5.48	6.39	6.5
	48	46.4	55.1	51.23	50.4	39.88	50.46	45.43	44.95	36.91	38.59	41.02	42.93	79.18	84.45	82.87	45.71	75.65	76.83	94.42	73.79	66.87	63.62	65.63	80.44	87.38	103.35	106.33	104.81	96.61	93.78	96.28	83.57	98.36	91.69	92.7	93.66	146.58	217.2	164.75	172.11	123.22	170.37	141.65	130.88	113.47	140.12	125.09	132.14
	72	85.33	96.62	97.63	92.13	83.55	90.09	104.06	91.27	89.08	95.23	94.15	92.17	162.87	205.55	180.93	185.23	179.3	177.79	190.59	162.21	147.17	156.02	163.81	172.11	165.93	168.09	161.72	150.27	186.04	164.48	164.82	179.93	166.92	184.4	170.46	174.56	251.3	271.76	280.34	286.25	195.75	226.68	231.35	228.26	212.19	230.31	223.65	225.3
	96	108.98	107.2	98.92	97.03	91.31	97.21	94.71	94.58	98.19	106.09	101.08	104.68	173.8	186.24	211.84	171.5	166.49	203.1	182.12	179.07	138.78	196.05	184.23	189.5	262.75	198.83	195.59	211.56	182.21	199.76	195.26	222.53	167.59	183.7	190.89	195.46	178.67	265.62	275.82	272.34	246.97	275.37	268.75	269.68	276.36	268.07	259.73	254
[truncated: 24 more columns]
