# Supplementary material for: A novel baculovirus-derived promoter with high activity in the baculovirus expression system
Source: PeerJ. 2016 Jun 28;4:e2183. doi: 10.7717/peerj.2183 (PMC4928464; doi:10.7717/peerj.2183)
Supplement: Table S1 [file peerj-04-2183-s001.docx]

| Primer name | Sequence (5’-3’) |
| --- | --- |
| ***Cloning*** |  |
| pSeLF | ggatccgtatacatcatgtgtttgaacggcgactg |
| pSeLR | gactagtatattgtagcaaaaatttaatttttgccaaaag |
| pSeSF | ggatccgtatacatcatgtgtttgaacggcgactg |
| pSeSR | gactagtgccaaaagacttaataaatcatcagc |
| pSeL-140F | tagtataccgaatgtacaatattgttg |
| pSeL-140R | ctgggtgtagcgtcgtaagc |
| pSeL-120F | tagtatacgttcaataatcaataaacctctc |
| pSeL-120R | ctgggtgtagcgtcgtaagc |
| polh-pSeLF | atctcgaggttcaataatcaataaacctctctattatcctttgtaaattttttatttactttgttgtccattgctgatcat |
| polh-pSeLR | ctgggtgtagcgtcgtaagc |
| ***qPCR*** |  |
| qF-AcMNPV-pol | gggtcaggctcctctttgc |
| qR-AcMNPV-pol | ttacgcagccatcacaaacac |

Table S1. Sequence of the primers employed in the study
